# Supplementary material for: Development and Iodine Testing of a Novel C12A7 Electride Planar Hollow Cathode
Source: Research Square preprint supplement (doi:10.21203/rs.3.rs-5738180/v1), 2025-01-13
Supplement: Supplementary file 1 [file 43c83084be2cfa120544e3a9.xlsx]

## Sheet: Figure 5
Proportional Iodine Valve Testing Data - Figure 5
Pressure in mbar	Valve Position in %	Krypton flow rate in sccm
10	75	5.78
10	78	7.39
10	80	8.65
10	83	9.69
10	85	10.54
10	88	11.38
10	90	11.98
10	93	12.34
10	95	12.67
10	98	12.96
10	100	13.21
13	73	5.88
13	75	8.24
13	78	10.6
13	80	12.77
13	83	14.41
13	85	15.43
13	88	16.63
13	90	17.4
13	93	17.93
13	95	18.49
13	98	18.74
13	100	19.14
15	73	7.05
15	75	9.87
15	78	13.47
15	80	15.98
15	83	17.99
15	85	19.27
15	88	20.6
15	90	21.53
15	93	22.22
15	95	22.93
15	98	23.24
15	100	23.83
17	73	8.23
17	75	12.48
17	78	19.77
17	80	22.04
17	83	23.72
17	85	25.18
17	88	26.09
17	90	26.95
17	93	27.6
17	95	28
17	98	28.72
20	73	9.98
20	75	16.72
20	78	22.03
20	80	25.85
20	83	28.45
Fitted Data	Fitting function:	y = alpha(x) * p + beta(x)
Iodine tank temperature	10mbar (67.2°C)					13mbar (71.4°C)						15mbar (73.7°C)						17mbar (75.9°C)						20mbar (78.7°C)						25mbar (82.7°C)						30mbar (86.1°C)
p in mbar	x	alpha	beta	y		p in mbar	x	alpha	beta	y		p in mbar	x	alpha	beta	y		p in mbar	x	alpha	beta	y		p in mbar	x	alpha	beta	y		p in mbar	x	alpha	beta	y		p in mbar	x	alpha	beta	y
10	50	-38.0091	420.582	40.4912		13	50	-38.0091	420.582	-73.5361		15	50	-38.0091	420.582	-149.554		17	50	-38.0091	420.582	-225.573		20	50	-38.0091	420.582	-339.6		25	50	-38.0091	420.582	-529.645		30	50	-38.0091	420.582	-719.691
10	51	-34.2932	378.458	35.5264		13	51	-34.2932	378.458	-67.3531		15	51	-34.2932	378.458	-135.939		17	51	-34.2932	378.458	-204.526		20	51	-34.2932	378.458	-307.405		25	51	-34.2932	378.458	-478.871		30	51	-34.2932	378.458	-650.337
10	52	-30.8413	339.447	31.0337		13	52	-30.8413	339.447	-61.4903		15	52	-30.8413	339.447	-123.173		17	52	-30.8413	339.447	-184.856		20	52	-30.8413	339.447	-277.38		25	52	-30.8413	339.447	-431.586		30	52	-30.8413	339.447	-585.793
10	53	-27.6408	303.394	26.9861		13	53	-27.6408	303.394	-55.9363		15	53	-27.6408	303.394	-111.218		17	53	-27.6408	303.394	-166.5		20	53	-27.6408	303.394	-249.422		25	53	-27.6408	303.394	-387.626		30	53	-27.6408	303.394	-525.83
10	54	-24.6792	270.149	23.3574		13	54	-24.6792	270.149	-50.6801		15	54	-24.6792	270.149	-100.038		17	54	-24.6792	270.149	-149.397		20	54	-24.6792	270.149	-223.434		25	54	-24.6792	270.149	-346.83		30	54	-24.6792	270.149	-470.226
10	55	-21.9442	239.564	20.122		13	55	-21.9442	239.564	-45.7107		15	55	-21.9442	239.564	-89.5992		17	55	-21.9442	239.564	-133.488		20	55	-21.9442	239.564	-199.32		25	55	-21.9442	239.564	-309.042		30	55	-21.9442	239.564	-418.763
10	56	-19.4242	211.498	17.2553		13	56	-19.4242	211.498	-41.0174		15	56	-19.4242	211.498	-79.8658		17	56	-19.4242	211.498	-118.714		20	56	-19.4242	211.498	-176.987		25	56	-19.4242	211.498	-274.108		30	56	-19.4242	211.498	-371.229
10	57	-17.1076	185.809	14.7332		13	57	-17.1076	185.809	-36.5896		15	57	-17.1076	185.809	-70.8048		17	57	-17.1076	185.809	-105.02		20	57	-17.1076	185.809	-156.343		25	57	-17.1076	185.809	-241.881		30	57	-17.1076	185.809	-327.419
10	58	-14.9832	162.364	12.5325		13	58	-14.9832	162.364	-32.417		15	58	-14.9832	162.364	-62.3833		17	58	-14.9832	162.364	-92.3496		20	58	-14.9832	162.364	-137.299		25	58	-14.9832	162.364	-212.215		30	58	-14.9832	162.364	-287.131
10	59	-13.04	141.031	10.6306		13	59	-13.04	141.031	-28.4895		15	59	-13.04	141.031	-54.5695		17	59	-13.04	141.031	-80.6496		20	59	-13.04	141.031	-119.77		25	59	-13.04	141.031	-184.97		30	59	-13.04	141.031	-250.17
10	60	-11.2676	121.682	9.00572		13	60	-11.2676	121.682	-24.7971		15	60	-11.2676	121.682	-47.3323		17	60	-11.2676	121.682	-69.8676		20	60	-11.2676	121.682	-103.67		25	60	-11.2676	121.682	-160.008		30	60	-11.2676	121.682	-216.347
10	61	-9.65568	104.194	7.6369		13	61	-9.65568	104.194	-21.3301		15	61	-9.65568	104.194	-40.6415		17	61	-9.65568	104.194	-59.9529		20	61	-9.65568	104.194	-88.9199		25	61	-9.65568	104.194	-137.198		30	61	-9.65568	104.194	-185.477
10	62	-8.19429	88.4467	6.50382		13	62	-8.19429	88.4467	-18.079		15	62	-8.19429	88.4467	-34.4676		17	62	-8.19429	88.4467	-50.8562		20	62	-8.19429	88.4467	-75.439		25	62	-8.19429	88.4467	-116.41		30	62	-8.19429	88.4467	-157.382
10	63	-6.87379	74.3248	5.58692		13	63	-6.87379	74.3248	-15.0345		15	63	-6.87379	74.3248	-28.782		17	63	-6.87379	74.3248	-42.5296		20	63	-6.87379	74.3248	-63.151		25	63	-6.87379	74.3248	-97.5199		30	63	-6.87379	74.3248	-131.889
10	64	-5.68488	61.7162	4.86738		13	64	-5.68488	61.7162	-12.1873		15	64	-5.68488	61.7162	-23.557		17	64	-5.68488	61.7162	-34.9268		20	64	-5.68488	61.7162	-51.9814		25	64	-5.68488	61.7162	-80.4058		30	64	-5.68488	61.7162	-108.83
10	65	-4.61855	50.5126	4.32715		13	65	-4.61855	50.5126	-9.5285		15	65	-4.61855	50.5126	-18.7656		17	65	-4.61855	50.5126	-28.0027		20	65	-4.61855	50.5126	-41.8583		25	65	-4.61855	50.5126	-64.9511		30	65	-4.61855	50.5126	-88.0438
10	66	-3.66611	40.6101	3.9489		13	66	-3.66611	40.6101	-7.04944		15	66	-3.66611	40.6101	-14.3817		17	66	-3.66611	40.6101	-21.7139		20	66	-3.66611	40.6101	-32.7122		25	66	-3.66611	40.6101	-51.0428		30	66	-3.66611	40.6101	-69.3734
10	67	-2.8192	31.9081	3.71606		13	67	-2.8192	31.9081	-4.74154		15	67	-2.8192	31.9081	-10.3799		17	67	-2.8192	31.9081	-16.0183		20	67	-2.8192	31.9081	-24.4759		25	67	-2.8192	31.9081	-38.5719		30	67	-2.8192	31.9081	-52.6679
10	68	-2.06974	24.3102	3.61278		13	68	-2.06974	24.3102	-2.59645		15	68	-2.06974	24.3102	-6.73594		17	68	-2.06974	24.3102	-10.8754		20	68	-2.06974	24.3102	-17.0847		25	68	-2.06974	24.3102	-27.4334		30	68	-2.06974	24.3102	-37.7821
10	69	-1.41	17.7239	3.62396		13	69	-1.41	17.7239	-0.606035		15	69	-1.41	17.7239	-3.42603		17	69	-1.41	17.7239	-6.24603		20	69	-1.41	17.7239	-10.476		25	69	-1.41	17.7239	-17.526		30	69	-1.41	17.7239	-24.576
10	70	-0.832532	12.0606	3.73526		13	70	-0.832532	12.0606	1.23766		15	70	-0.832532	12.0606	-0.4274		17	70	-0.832532	12.0606	-2.09246		20	70	-0.832532	12.0606	-4.59006		25	70	-0.832532	12.0606	-8.75272		30	70	-0.832532	12.0606	-12.9154
10	71	-0.330225	7.23531	3.93306		13	71	-0.330225	7.23531	2.94239		15	71	-0.330225	7.23531	2.28194		17	71	-0.330225	7.23531	1.62149		20	71	-0.330225	7.23531	0.630819		25	71	-0.330225	7.23531	-1.0203		30	71	-0.330225	7.23531	-2.67143
10	72	0.103729	3.16721	4.20451		13	72	0.103729	3.16721	4.51569		15	72	0.103729	3.16721	4.72315		17	72	0.103729	3.16721	4.93061		20	72	0.103729	3.16721	5.2418		25	72	0.103729	3.16721	5.76045		30	72	0.103729	3.16721	6.27909
10	73	0.475821	-0.220752	4.53746		13	73	0.475821	-0.220752	5.96492		15	73	0.475821	-0.220752	6.91657		17	73	0.475821	-0.220752	7.86821		20	73	0.475821	-0.220752	9.29567		25	73	0.475821	-0.220752	11.6748		30	73	0.475821	-0.220752	14.0539
10	74	0.792229	-3.00175	4.92054		13	74	0.792229	-3.00175	7.29723		15	74	0.792229	-3.00175	8.88169		17	74	0.792229	-3.00175	10.4662		20	74	0.792229	-3.00175	12.8428		25	74	0.792229	-3.00175	16.804		30	74	0.792229	-3.00175	20.7651
10	75	1.05882	-5.24506	5.34312		13	75	1.05882	-5.24506	8.51957		15	75	1.05882	-5.24506	10.6372		17	75	1.05882	-5.24506	12.7548		20	75	1.05882	-5.24506	15.9313		25	75	1.05882	-5.24506	21.2254		30	75	1.05882	-5.24506	26.5195
10	76	1.28114	-7.01608	5.79529		13	76	1.28114	-7.01608	9.63869		15	76	1.28114	-7.01608	12.201		17	76	1.28114	-7.01608	14.7632		20	76	1.28114	-7.01608	18.6066		25	76	1.28114	-7.01608	25.0123		30	76	1.28114	-7.01608	31.418
10	77	1.46442	-8.37632	6.26789		13	77	1.46442	-8.37632	10.6612		15	77	1.46442	-8.37632	13.59		17	77	1.46442	-8.37632	16.5188		20	77	1.46442	-8.37632	20.9121		25	77	1.46442	-8.37632	28.2342		30	77	1.46442	-8.37632	35.5563
10	78	1.6136	-9.38344	6.75252		13	78	1.6136	-9.38344	11.5933		15	78	1.6136	-9.38344	14.8205		17	78	1.6136	-9.38344	18.0477		20	78	1.6136	-9.38344	22.8885		25	78	1.6136	-9.38344	30.9565		30	78	1.6136	-9.38344	39.0244
10	79	1.73327	-10.0912	7.24151		13	79	1.73327	-10.0912	12.4413		15	79	1.73327	-10.0912	15.9078		17	79	1.73327	-10.0912	19.3744		20	79	1.73327	-10.0912	24.5742		25	79	1.73327	-10.0912	33.2405		30	79	1.73327	-10.0912	41.9069
10	80	1.82773	-10.5494	7.72793		13	80	1.82773	-10.5494	13.2111		15	80	1.82773	-10.5494	16.8666		17	80	1.82773	-10.5494	20.5221		20	80	1.82773	-10.5494	26.0053		25	80	1.82773	-10.5494	35.1439		30	80	1.82773	-10.5494	44.2826
10	81	1.90097	-10.8041	8.20559		13	81	1.90097	-10.8041	13.9085		15	81	1.90097	-10.8041	17.7105		17	81	1.90097	-10.8041	21.5124		20	81	1.90097	-10.8041	27.2153		25	81	1.90097	-10.8041	36.7202		30	81	1.90097	-10.8041	46.225
10	82	1.95665	-10.8975	8.66906		13	82	1.95665	-10.8975	14.539		15	82	1.95665	-10.8975	18.4523		17	82	1.95665	-10.8975	22.3656		20	82	1.95665	-10.8975	28.2356		25	82	1.95665	-10.8975	38.0188		30	82	1.95665	-10.8975	47.8021
10	83	1.99813	-10.8676	9.11363		13	83	1.99813	-10.8676	15.108		15	83	1.99813	-10.8676	19.1043		17	83	1.99813	-10.8676	23.1005		20	83	1.99813	-10.8676	29.0949		25	83	1.99813	-10.8676	39.0855		30	83	1.99813	-10.8676	49.0762
10	84	2.02844	-10.749	9.53535		13	84	2.02844	-10.749	15.6207		15	84	2.02844	-10.749	19.6775		17	84	2.02844	-10.749	23.7344		20	84	2.02844	-10.749	29.8197		25	84	2.02844	-10.749	39.9619		30	84	2.02844	-10.749	50.1041
10	85	2.0503	-10.572	9.93101		13	85	2.0503	-10.572	16.0819		15	85	2.0503	-10.572	20.1825		17	85	2.0503	-10.572	24.2831		20	85	2.0503	-10.572	30.4341		25	85	2.0503	-10.572	40.6856		30	85	2.0503	-10.572	50.9371
10	86	2.06614	-10.3633	10.2981		13	86	2.06614	-10.3633	16.4966		15	86	2.06614	-10.3633	20.6289		17	86	2.06614	-10.3633	24.7611		20	86	2.06614	-10.3633	30.9596		25	86	2.06614	-10.3633	41.2903		30	86	2.06614	-10.3633	51.621
10	87	2.07805	-10.1456	10.635		13	87	2.07805	-10.1456	16.8691		15	87	2.07805	-10.1456	21.0253		17	87	2.07805	-10.1456	25.1814		20	87	2.07805	-10.1456	31.4155		25	87	2.07805	-10.1456	41.8058		30	87	2.07805	-10.1456	52.1961
10	88	2.08782	-9.93761	10.9406		13	88	2.08782	-9.93761	17.204		15	88	2.08782	-9.93761	21.3797		17	88	2.08782	-9.93761	25.5553		20	88	2.08782	-9.93761	31.8188		25	88	2.08782	-9.93761	42.2579		30	88	2.08782	-9.93761	52.697
10	89	2.09691	-9.75438	11.2147		13	89	2.09691	-9.75438	17.5054		15	89	2.09691	-9.75438	21.6992		17	89	2.09691	-9.75438	25.893		20	89	2.09691	-9.75438	32.1838		25	89	2.09691	-9.75438	42.6683		30	89	2.09691	-9.75438	53.1528
10	90	2.10648	-9.60696	11.4578		13	90	2.10648	-9.60696	17.7772		15	90	2.10648	-9.60696	21.9902		17	90	2.10648	-9.60696	26.2032		20	90	2.10648	-9.60696	32.5226		25	90	2.10648	-9.60696	43.055		30	90	2.10648	-9.60696	53.5874
10	91	2.11737	-9.50253	11.6712		13	91	2.11737	-9.50253	18.0233		15	91	2.11737	-9.50253	22.258		17	91	2.11737	-9.50253	26.4928		20	91	2.11737	-9.50253	32.8449		25	91	2.11737	-9.50253	43.4317		30	91	2.11737	-9.50253	54.0186
10	92	2.13012	-9.4444	11.8568		13	92	2.13012	-9.4444	18.2471		15	92	2.13012	-9.4444	22.5073		17	92	2.13012	-9.4444	26.7676		20	92	2.13012	-9.4444	33.1579		25	92	2.13012	-9.4444	43.8085		30	92	2.13012	-9.4444	54.4591
10	93	2.14493	-9.43199	12.0173		13	93	2.14493	-9.43199	18.4521		15	93	2.14493	-9.43199	22.742		17	93	2.14493	-9.43199	27.0318		20	93	2.14493	-9.43199	33.4666		25	93	2.14493	-9.43199	44.1913		30	93	2.14493	-9.43199	54.9159
10	94	2.16171	-9.46084	12.1563		13	94	2.16171	-9.46084	18.6414		15	94	2.16171	-9.46084	22.9649		17	94	2.16171	-9.46084	27.2883		20	94	2.16171	-9.46084	33.7734		25	94	2.16171	-9.46084	44.582		30	94	2.16171	-9.46084	55.3906
10	95	2.18005	-9.52261	12.2779		13	95	2.18005	-9.52261	18.8181		15	95	2.18005	-9.52261	23.1782		17	95	2.18005	-9.52261	27.5383		20	95	2.18005	-9.52261	34.0784		25	95	2.18005	-9.52261	44.9787		30	95	2.18005	-9.52261	55.879
10	96	2.19922	-9.60509	12.3871		13	96	2.19922	-9.60509	18.9848		15	96	2.19922	-9.60509	23.3832		17	96	2.19922	-9.60509	27.7817		20	96	2.19922	-9.60509	34.3793		25	96	2.19922	-9.60509	45.3755		30	96	2.19922	-9.60509	56.3716
10	97	2.21818	-9.69218	12.4896		13	97	2.21818	-9.69218	19.1442		15	97	2.21818	-9.69218	23.5805		17	97	2.21818	-9.69218	28.0169		20	97	2.21818	-9.69218	34.6714		25	97	2.21818	-9.69218	45.7623		30	97	2.21818	-9.69218	56.8533
10	98	2.23558	-9.76389	12.5919		13	98	2.23558	-9.76389	19.2986		15	98	2.23558	-9.76389	23.7697		17	98	2.23558	-9.76389	28.2409		20	98	2.23558	-9.76389	34.9476		25	98	2.23558	-9.76389	46.1255		30	98	2.23558	-9.76389	57.3034
10	99	2.24974	-9.79637	12.701		13	99	2.24974	-9.79637	19.4502		15	99	2.24974	-9.79637	23.9497		17	99	2.24974	-9.79637	28.4492		20	99	2.24974	-9.79637	35.1984		25	99	2.24974	-9.79637	46.4471		30	99	2.24974	-9.79637	57.6958
10	100	2.25869	-9.76187	12.825		13	100	2.25869	-9.76187	19.6011		15	100	2.25869	-9.76187	24.1185		17	100	2.25869	-9.76187	28.6358		20	100	2.25869	-9.76187	35.4119		25	100	2.25869	-9.76187	46.7053		30	100	2.25869	-9.76187	57.9988

## Sheet: Figure 6
Iodine Feeding Comparison - Figure 6
Iodine			Krypton
Flow control setting	Chamber Pressure		Flow control setting	Chamber Pressure
Mean	Mean	Std	Mean	Mean	Std
100	0.00196447	2.05877e-05	98.6	0.0001416	5.39882e-06
98.5075	0.00191345	1.36914e-05	97.1714	0.000120856	8.16405e-06
97.0149	0.00186207	2.05744e-05	95.7429	0.00010779	4.22262e-06
95.5224	0.00180275	1.7673e-05	94.3143	9.44966e-05	3.84326e-06
94.0299	0.00174582	1.71637e-05	92.8857	8.47439e-05	2.99548e-06
92.5373	0.00169561	1.30932e-05	91.4571	7.54755e-05	1.91619e-06
91.0448	0.0016478	1.53772e-05	90.0286	6.77671e-05	2.87749e-06
89.5522	0.00160022	1.78052e-05	88.6	6.13181e-05	1.9822e-06
88.0597	0.00155351	1.57327e-05	87.1714	5.48615e-05	1.53739e-06
86.5672	0.0015042	1.70801e-05	85.7429	4.92117e-05	1.64279e-06
85.0746	0.00145585	1.64889e-05	84.3143	4.47446e-05	1.12608e-06
83.5821	0.00140718	1.67626e-05	82.8857	4.07715e-05	1.34489e-06
82.0896	0.00135359	1.60172e-05	81.4571	3.72517e-05	8.89243e-07
80.597	0.0013058	1.75123e-05	80.0286	3.39783e-05	1.01203e-06
79.1045	0.00125248	1.75025e-05	78.6	3.14817e-05	7.09449e-07
77.6119	0.00119976	1.80519e-05	77.1714	2.91975e-05	6.36848e-07
76.1194	0.0011434	1.75182e-05	75.7429	2.72671e-05	6.02355e-07
74.6269	0.00108918	1.77752e-05	74.3143	2.5545e-05	4.34351e-07
73.1343	0.00102605	2.02198e-05	72.8857	2.40454e-05	4.71958e-07
71.6418	0.000965833	1.93869e-05	71.4571	2.26868e-05	3.25502e-07
70.1493	0.000901822	2.18646e-05	70.0286	2.14249e-05	3.26657e-07
68.6567	0.000844488	2.19945e-05	68.6	2.03714e-05	2.83026e-07
67.1642	0.00077217	2.02621e-05	67.1714	1.94108e-05	2.5769e-07
65.6716	0.000705623	1.83471e-05	65.7429	1.85772e-05	2.4146e-07
64.1791	0.00063703	2.6491e-05	64.3143	1.78398e-05	1.97701e-07
62.6866	0.000565868	2.20499e-05	62.8857	1.71836e-05	1.84078e-07
61.194	0.000491114	2.3882e-05	61.4571	1.65956e-05	1.69802e-07
59.7015	0.000425644	2.19033e-05	60.0286	1.6054e-05	1.4675e-07
58.209	0.000352856	2.04387e-05	58.6	1.55756e-05	1.34409e-07
56.7164	0.000289092	1.7342e-05	57.1714	1.51422e-05	1.20002e-07
55.2239	0.000230566	1.56577e-05	55.7429	1.47495e-05	1.11356e-07
53.7313	0.000176274	1.4824e-05	54.3143	1.43802e-05	1.03255e-07
52.2388	0.000130906	1.24737e-05	52.8857	1.40291e-05	9.57901e-08
50.7463	0.000100901	7.71183e-06	51.4571	1.37118e-05	9.0566e-08
49.2537	7.99155e-05	5.21787e-06	50.0286	1.34125e-05	8.34678e-08
47.7612	6.43962e-05	4.05442e-06	48.6	1.31325e-05	8.36142e-08
46.2687	5.1926e-05	3.25058e-06	47.1714	1.28673e-05	7.37641e-08
44.7761	4.26783e-05	2.35575e-06	45.7429	1.2613e-05	7.2809e-08
43.2836	3.55566e-05	1.89924e-06	44.3143	1.23763e-05	6.76253e-08
41.791	3.02965e-05	1.32395e-06	42.8857	1.21498e-05	6.35317e-08
40.2985	2.63707e-05	1.00478e-06	41.4571	1.19361e-05	6.2028e-08
38.806	2.33387e-05	7.90754e-07	40.0286	1.17307e-05	5.96557e-08
37.3134	2.08762e-05	6.08397e-07	38.6	1.15319e-05	5.7328e-08
35.8209	1.89771e-05	4.8641e-07	37.1714	1.13421e-05	5.43175e-08
34.3284	1.7499e-05	3.80118e-07	35.7429	1.11655e-05	5.16872e-08
32.8358	1.63141e-05	3.13633e-07	34.3143	1.09919e-05	4.93144e-08
31.3433	1.53502e-05	2.51178e-07	32.8857	1.08301e-05	4.69482e-08
29.8507	1.45574e-05	2.13738e-07	31.4571	1.067e-05	4.46548e-08
28.3582	1.3864e-05	1.84176e-07	30.0286	1.05233e-05	4.29889e-08
26.8657	1.32669e-05	1.6327e-07	28.6	1.03774e-05	4.32235e-08
25.3731	1.27351e-05	1.47016e-07	27.1714	1.02364e-05	3.80792e-08
23.8806	1.22586e-05	1.31027e-07	25.7429	1.01041e-05	3.84126e-08
22.3881	1.18292e-05	1.19474e-07	24.3143	9.97409e-06	3.79848e-08
20.8955	1.14333e-05	1.10184e-07	22.8857	9.85207e-06	3.38392e-08
19.403	1.10753e-05	1.00564e-07	21.4571	9.73392e-06	3.45224e-08
17.9104	1.07469e-05	9.243e-08	20.0286	9.61363e-06	3.36777e-08
16.4179	1.04475e-05	8.49807e-08	18.6	9.50336e-06	3.09292e-08
14.9254	1.01677e-05	7.64004e-08	17.1714	9.39545e-06	3.13982e-08
13.4328	9.91051e-06	7.07793e-08	15.7429	9.29089e-06	3.13411e-08
11.9403	9.67144e-06	6.93256e-08	14.3143	9.18665e-06	2.92964e-08
10.4478	9.44728e-06	6.24335e-08	12.8857	9.09048e-06	2.79037e-08
8.95522	9.2367e-06	6.03927e-08	11.4571	8.99347e-06	2.83606e-08
7.46269	9.04005e-06	5.62655e-08	10.0286	8.89891e-06	2.61535e-08
5.97015	8.8505e-06	5.41289e-08	8.6	8.80577e-06	2.84768e-08
4.47761	8.67344e-06	4.76431e-08	7.17143	8.71619e-06	2.44847e-08
2.98507	8.51117e-06	4.73556e-08	5.74286	8.63409e-06	2.35091e-08
1.49254	8.34832e-06	4.66079e-08	4.31429	8.55326e-06	2.45498e-08
			2.88571	8.47231e-06	2.38102e-08
			1.45714	8.39038e-06	2.33053e-08
			0.0285714	8.30944e-06	2.24383e-08

## Sheet: Figure 9
Planar hollow cathode testing data - Figure 9
Hand recorded data. For the automatically recorded data contact the author please.
Configuration A
time	U_heater	P_heater	m_Kr	U_keeper	I_keeper	U_anode	I_anode	T_base	p_chamber	Total Power	Efficiency
	in V	in W	in sccm	in V	in mA	in V	in A	in °C	in mbar	in W	in W/A
1403	0	0	8	25.8	1000	51.5	0.48	176	0.000224	50.52	105.25
1329	0	0	8	33.6	50	65.5	1	179	0.000225	67.18	67.18
1332	0	0	8	23.2	50	58	1.5	178	0.000226	88.16	58.7733
1334	0	0	8	23.4	50.1	57.7	1.8	179	0.000226	105.032	58.3513
1327	0	0	5	31.7	400	66.6	0.8	180	0.000143	65.96	82.45
1411	0	0	5	27.8	1200	59	0.58	178.7	0.000143	67.58	116.517
Configuration B
time	U_heater	P_heater	m_Kr	U_keeper	I_keeper	U_anode	I_anode	T_tube	p_chamber	Total Power	Efficiency
	in V	in W	in sccm	in V	in mA	in V	in A	in °C	in mbar	in W	in W/A
1204	0	0	5	10.09	100	49.6	1.8	728	0.00015	90.289	50.1606
1206	0	0	5	10.39	100	48.07	1.7	720	0.000153	82.758	48.6812
1208	0	0	5	10.68	100	46.15	1.6	711.2	0.000153	74.908	46.8175
1210	0	0	5	11.06	100	45.3	1.5	696	0.000153	69.056	46.0373
1212	0	0	5	10.7	100	45.1	1.4	683	0.000153	64.21	45.8643
1214	0	0	5	11.02	100	45.6	1.3	667.3	0.000153	60.382	46.4477
1216	0	0	5	11.2	100	46.4	1.2	647	0.000153	56.8	47.3333
1218	0	0	5	11.4	100	47.5	1.1	631	0.000152	53.39	48.5364
1220	0	0	5	12.2	100	48.5	1	611.5	0.000153	49.72	49.72
1222	0	0	5	12.5	100	49.5	0.9	596.3	0.000153	45.8	50.8889
1224	0	0	5	14.3	100	52	0.8	566	0.000152	43.03	53.7875
1641	0	0	15	19.1	100	39.1	1.2	632	0.00038	48.83	40.6917
1644	0	0	15	21.3	100	42.2	1	620.4	0.00038	44.33	44.33
1647	0	0	15	22.6	100	43.8	0.9	608.3	0.000381	41.68	46.3111
1648	0	0	15	23.7	100	44.6	0.8	584	0.00038	38.05	47.5625
1649	0	0	15	19.5	100	40.6	1.1	586.7	0.000381	46.61	42.3727

## Sheet: Figure 11
Keeper voltage of the C12A7:e- planar cathode in configuration B - Figure 11
Test a.)
Hand recorded data. For the automatically recorded data contact the author please.
time	Heater volt.	Heater Pow.	Keeper		Anode		pressure
	in V	in W	in V	in mA	in V	in mA	in mbar	Comment
915	2.5	8	0	0	0	0	3.97e-06
920	9.8	100	300		300
928								first ignition
			46	1200	85	1.042
939			50	1200	78	1.042	7.1E-5	pres: 23.86 mV
1022							0.000323	Heating stopped, pressure still stays. Forepump is very loud.
								end of test due to keeper short-circuit
Test c.)
Hand recorded data. For the automatically recorded data contact the author please.
time	Heater volt.	Heater Pow.	Krypton	Keeper		Anode		pressure	Cathode press.
	in V	in W	in sccm	in V	in mA	in V	in mA	in mbar	in mbar	Comment
1139	0	0	0	0	0	0	0	5.27e-06	0
1140	7.2	72.6	20	200	1200	200	1500			direct ignition
1142	0	0	5	13.8	1200	58	1500	0.00016	16.4	only plume mode
1145	0	0	20	14.2	1000	42	2000	0.00054	34.6
			20	14.3	1000	39	1900			too unstable
				13.2		39.2	1800
				14.4			1700
1155	0	0	20	15.2	1200	39.3	2000	0.000545	36.4	no stable point, probably related to the geometry changes (pressure is a lot lower thn the last time)
1158										end of test
Test e.)
Hand recorded data. For the automatically recorded data contact the author please.
time	Heater volt.	Heater Pow.	Krypton	Keeper		Anode		pressure	Cathode press.	Temperature inside cathode
	in V	in W	in sccm	in V	in mA	in V	in mA	in mbar	in mbar	in °C	Comment
										28.3	started heating
1518	9.2	62.8	0	100	0.033	0	0	0.0002	0	784
1520	11.7	97	10	200	0.04	200	0	0.000275	26.7		TC error, heater behaves strange
1520	0	0	10	19.4	1000	46.6	1200	0.000271	28.1	768	ignition at 400V/300V/15 sccm without sparking at 100W heater power
1523	0	0	10	22.2	900	45.9	1200	0.000268	27.8	714
				22.6	800	46.3
				23.1	700	46.5
				23.6	600	46.9
				24.1	500	47.2
				24.8	400	48
				25.3	300	48.4
				25.8	200	49
				26.5	100	49.1
				25.5	10	50.2
1525	0	0	11	26.5	10	50.6	1200	0.000292	29	711	plume mode
			12	26.1		50.1
			13	26		49.8			32
			14	25.6		49.4
			15	25.1		48.8
1528	0	0	20	23.1	10	38.9	1200	0.000518	41.1	699	spot mode
1530	0	0	22	23.7	10	38	1200	0.000567	43.2	684	spot mode
											Anode fluctuation: 185 mA f: 19.6 kHz
											plume mode when keeper is activated
1532	0	0	16	23.1	1000	33.3	1200	0.000418			spot mode, very unstable
1534			17	21.6	1000	32.3	1200	0.000444	38.4	776	spot mode, very unstable, 240mA 27.4 kHz
											instant reignition at 400V
1536	0	0	10	23.5	1000	44.8	1100	0.000268	27.9	780	plume mode
				23.9		45.5	1000
				25.3		45.6	900
				26.6		46.3	800
				27.6		45.3	700
				28.7		45.6	600
				30.1		46	500
				31.8		46.3	400
				33.5		46.6	300
				35.7		45.5	200
				38.4		48.6	100				Anode fluctuation: 228 mA, f: 7kHz
1543	0	0	5	44.5	1000	58	100	0.00014	18.7	810	directly ignites to anode if anode is switched off and on again
1547	0	0	15	30.6	200	45	1000	0.000394	34.3	771	spot mode

## Sheet: Figure 15
Planar hollow cathode spot mode parameter study - Figure 15
Data used for the diagram:
	Orifice Diameter 0.45 mm				Orifice Diameter 1 mm				Orifice Diameter 1.4 mm
	Anode		Cathode		Anode		Cathode		Anode		Cathode
Flowrate	Current	Voltage	Current	Voltage	Current	Voltage	Current	Voltage	Current	Voltage	Current	Voltage
in sccm	in A	in V	in A	in V	in A	in V	in A	in V	in A	in V	in A	in V
5	0.5				0.5	52.8	1.2	31.8	0.5
10	0.5				0.5	36	1.2	24.7	0.5
15	0.5				0.5				0.5
20	0.5				0.5	29.9	0.9	25.5	0.5	63	0	0
25	0.5				0.5				0.5
30	0.5				0.5	26.6	1.1	20.8	0.5	56.7	0.8	31.8
5	1				1				1
10	1				1	35	1.2	21.7	1
15	1				1	31.2	0.3	24.7	1	61.9	0	0
20	1				1	25.7	1.1	20	1	47.7	0	0
25	1				1				1	59	0	0
30	1				1				1	50.1	0.4	27.8
5	1.5				1.5				1.5
10	1.5				1.5	37.1	1.2	21	1.5
15	1.5				1.5				1.5	54.6	0	0
20	1.5				1.5	38.3	0.9	18.55	1.5	42.5	0	0
25	1.5				1.5				1.5	48	0	0
30	1.5				1.5				1.5	45.6	0.5	22.9
5	2				2				2
10	2				2				2
15	2				2				2	47.5	0	0
20	2				2	22.2	1.2	16.7	2	49	0	0
25	2				2				2	43	0	0
30	2				2	25.3	1.1	16.1	2	35.1	0.1	18.1
5	2.5				2.5				2.5
10	2.5				2.5				2.5
15	2.5				2.5				2.5
20	2.5				2.5				2.5
25	2.5				2.5				2.5	26.3	0.1	14
30	2.5	24.1	0.1	10.47	2.5	23.1	1	15.3	2.5	33.1	0.1	15
5	3				3				3
10	3				3				3
15	3				3				3
20	3				3				3
25	3				3				3	28.2	0.1	12.6
30	3	25.2	0.1	9.65	3	23.4	1	15.2	3	38	0.2	14.7
Complete test data:
Hand recorded data. For the automatically recorded data contact the author please.
Orifice Diameter 0.45 mm
time	Krpyton	Keeper		Anode		pressure	Anode fluctuation
	in sccm	in V	in mA	in V	in mA	in mbar	Current	Frequency	Type
1537	15	15	100	40	1500	0.000369
1542	3	24.7	1200	39	500	9.17e-05	823mA	8.2kHz	plume
1545	5	19.9	1200	29.6	700	0.000137	175mA	450Hz	spot
1547	30	12.1	1200	20.1	3000	0.000705	196mA	1.2MHz	spot
	30	12.8	1100	22.9	3000		191mA	1.1MHz	spot
	30	12.45	1000	23.5	3000		191mA	1.0MHz	spot
	30	12.3	900	24.1	3000		187mA	1.1MHz	spot
	30	12.1	800	24.5	3000		188mA	1.1MHz	spot
	30	11.97	700	24.8	3000		189mA	1.1MHz	spot
	30	11.7	600	24.97	3000		190mA	1.1MHz	spot
	30	11.5	500	25	3000		187mA	1.1MHz	spot
	30	11.1	400	25.1	3000		187mA	1.1MHz	spot
	30	10.8	300	25.13	3000		190mA	1MHz	spot
	30	10.25	200	25.14	3000		188mA	1MHz	spot
	30	965	100	25.2	3000		186mA	1MHz	spot
1604	30	14.45	1200	33.8	2500	0.0007	1.2A	77kHz	plume
	30	14	1100	33.5	2500		1.2A	76kHz	spot
	30	13.8	1000	33.2	2500		1.2A	76kHz	plume
	30	13.6	900	32.8	2500		1.1A	77KHz	plume
	30	13.2	800	32.6	2500		1.18A	77kHz	plume
	30	12.8	700	32.4	2500		1.15A	77.3kHz	plume
	30	12.5	600	32.5	2500		1.1A	78kHz	plume
	30	12.2	500	32.3	2500		1.1A	78kHz	plume
	30	11.8	400	32.3	2500		1.1A	78.2kHz	plume
	30	11.4	300	32.4	2500		1.1A	78kHz	plume
	30	10.85	200	32.5	2500		1.05A	79kHz	plume
	30	10.47	100	24.1	2500		160mA	1.1MHz	spot
1618	30	14.5	1200	33.8	2000	0.00071	1.2A	68kHz	plume
	30	10.7	100	34.6	2000		1A	70kHz	plume
1622	30	16.2	1200	33.7	1500	0.00071	1.3A	60.4kHz	plume
	30	11.6	100	35.5	1500		1.05A	61kHz	plume
1624	30	17.3	1200	34.7	1000	0.00071	1.1A	55.2kHz	plume
	30	13	100	37.8	1000		820mA	56kHz	plume
1626	25	12.9	1200	35.9	3000	0.000597	1.4A	77kHz	plume
	25	9.75	100	35.5	3000		1.3A	80kHz	plume
1628	25	13.84	1200	33.8	2500	0.000598	1.6A	69kHz	plume
	25	10.23	100	34.1	2500		1.4A	72kHz	plume
1630	25	15.3	1200	33.3	2000	0.000598	1.45A	64kHz	plume
	25	10.7	100	34.7	2000		1.3A	65kHz	plume
1632	25	16.2	1200	34.4	1500	0.000598	1.6A	48hz	plume
	25	12	100	36.9	1500		1.2A	54kHz	plume
1634	25	17.6	1200	34.5	1000	0.000597	950mA	109kHz	plume
	25	14.2	100	36	1000		740mA	125kHz	plume
1636	20	13.8	1200	38.6	3000	0.000484	2.1A	66kHz	plume
	20	9.7	100	37.2	3000		1.8A	70.5KHz	plume
1638	20	14.1	1200	32	2500	0.000485	550mA	220kHz	transition
	20	10.8	100	34.2	2500		1.5A	22kHz	plume
1641	20	15.25	1200	30.7	2000	0.000485	850mA	16Hz	plume
	20	11.7	100	32.9	2000		610mA	15kHz	plume
1644	20	16.6	1200	34.5	1500	0.000484	1.2A	37kHz	plume
	20	13.3	100	33.8	1500		570mA	62kHz	plume
1646	20	18.2	1200	38.5	1000	0.000484	1A	66kHz	plume
	20	15	100	40.6	1000		720mA	91kHz	plume
1648	15	13.5	1200	36.6	3000	0.000369	1A	28kHz	plume
	15	10.7	100	35.7	3000		730mA	42 kHz	plume
1650	15	13.7	1200	37.7	2500	0.00037	2A	26kHz	plume
	15	11	100	35.1	2500		1.55A	24kHz	plume
1653	15	14.5	1200	38	2000	0.00037	1.3A	66kHz	plume
	15	11.8	100	38.4	2000		1.2A	74kHz	plume
1655	15	15.8	1200	35.8	1500	0.00037	1.1A	22kHz	plume
	15	13.64	100	39.1	1500		1.1A	50kHz	plume
1659	15	18.9	1200	37.8	1000	0.000369	960mA	29kHz	plume
	15	16.3	100	40.3	1000		820mA	27kHz	plume
1701	10	13.9	1200	42.7	3000	0.000252	1.5A	50kHz	plume
	10	10.9	100	43	3000		1.25A	63kHz	plume
1703	10	14.1	1200	37.7	2500	0.000253	800mA	21kHz	plume
	10	11.1	100	37.5	2500		850mA	30kHz	plume
1706	10	14.9	1200	41.2	2000	0.000253	800mA	42kHz	plume
	10	12.6	100	39.1	2000		502mA	35kHz	plume
1708	10	16.2	1200	38.8	1500	0.000253	1.7A	34kHz	plume
	10	14.4	100	39.5	1500		1.3A	10.5kHz	plume
1710	10	18	1200	38.5	1000	0.000252	1.25A	37kHz	plume
	10	17.9	100	40.1	1000		970mA	12kHz	plume
1712	5	15.4	1200	47.8	3000	0.00013	2.5A	27kHz	plume
	5	11.9	100	49.4	3000		2.1A	30kHz	plume
1714	5	15.5	1200	48.2	2500	0.000133	2.2A	33kHz	plume
	5	12.9	100	49.8	2500		1.8A	46kHz	plume
1716	5	16.8	1200	46.7	2000	0.000133	1.8A	62kHz	plume
	5	14.5	100	49.9	2000		1A	87kHz	plume
1718	5	18	1200	43.9	1500	0.000133	1.25A	74kHz	plume
	5	17.5	100	50	1500		970mA	93kHz	plume
1720	5	21.3	1200	44	1000	0.000133	825mA	110kHz	plume
	5	23.1	100	51.8	1000		790mA	77kHz	plume
1722	5	25.2	1200	45.2	500	0.000133	650mA	43kHz	plume
	5	34.3	100	64.2	500		355mA	12.8khz	plume
1725	30	8.76	100	19.1	3000	0.000714	194mA	1.1 MHz	plume
Orifice Diameter 1 mm
time	Krpyton	Keeper		Anode		pressure	Mount	Anode fluctuation
	in sccm	in V	in mA	in V	in mA	in mbar	temp. In °C	Current	Frequency	Comment
1409	30	15.2	1000	23.4	3000	0.00085	117
	30	14.9	900	24.4			151
	30	15.1	800	24.9			169
	30	15.15	700	25.4			191	189mA	3.4MHz
	30	14.5	600	26			207	1.88A	57kHz
	30	14.2	500	32.2			215
1418	30	15.3	1000	23.1	2500	0.000855	224	191mA	3.5kHz
	30	15.2	900	31			230	1.61A	57kHz
1420	30	16.1	1200	23	2000	0.000855	237	174mA	3.4kHz
	30	16.1	1100	25.3			244
	30	15.9	1000	33.1			245	1.84A	51kHz
1423	30	16.9	1200	32.4	1500	0.000855	247	1.37A	53kHz
1424	30	17.9	1200	32.8	1000	0.000855	249	1.1A	51.4kHz
1425	30	19.6	1200	24.5	500	0.000854	249	107mA	2.8MHz
	30	20.8	1100	26.6			249.8	105mA	2.5MHz
	30	21.4	1000	35.4			249	630mA	55kHz
1428	25	15.5	1200	36.9	3000	0.000714	248	2.3A	52kHz
1430	25	16.2	1200	33.8	2500	0.000718	266	2.5A	39kHz
1441	25	17.5	1200	34.6	2000	0.000719	267	2.2A	31kHz
1443	25	18.6	1200	34.4	1500	0.000719	268	1.71A	42kHz
1445	25	20.03	1200	35.1	1000	0.000717	268	1.45A	43kHz
1447	25	21.7	1200	32.8	500	0.000717	268	648mA	50kHz
1446	20	16.9	1200	39	3000	0.000571	267	1.2A	85kHz
1447	20	15.9	1200	36	2500	0.000571	266	2.8A	41.9kHz
1449	20	16.7	1200	22.2	2000	0.000574	268	160mA
1450	20	18	1200	27.1	1500	0.000573	269	218mA	2.7MHz
	20	17.8	1100	24.5				122mA	1.5MHz
	20	18	1000	24.7			268	145mA	1.1MHz
	20	18.55	900	38.3				130mA	1.2MHz
	20	20.1	900	46.1				1.78A	50kHz
	20	18.1	800	37.7			265	2A	42kHz
1458	20	19.7	1200	24.9	1000	0.000569	264	144mA	1.2MHz
	20	20	1100	25.7				143mA	1.2Mhz
	20	19.9	1000	37.1				1.55A	30.9MHz
1503	20	22.3	1200	36	500	0.000568	260	795mA	80kHz
	20	23.7	1100	28.9				120mA	1.2MHz
	20	24.8	1000	28.8				121mA	1.3MHz
	20	25.5	900	29.9				99mA	1.3MHz
	20		800							goes off, reignition
1508	30	0	0	26.3	3000	0.00085	256			anode only
1512	30	14.5	1200	27.7	3000	0.000857	257			reference
1513	15	16.6	1200	43.5	3000	0.000421	258	3A	30.7kHz
1514	15	17.7	1200	41.3	2500	0.000425	260	2.8A	30.6kHz
1515	15	20.38	1200	41.1	2000	0.000425	263	2.1A	50.7kHz
1516	15	21.8	1200	41.5	1500	0.000425	270	2.1A	28kHz
1517	15	18.2	1200	23	1000	4.24e.4	273	138mA	14.1kHz
	15	19.85	1100	25.8				128mA	61kHz
	15	20.64	1000	27			275	147mA	44kHz
	15	21.5	900	28				153mA	40kHz
	15	23.5	800	30			271	137mA	35kHz
	15	25.1	700	31.7				140mA	53kHz
	15	26.2	600	33.8				145mA	35kHz
	15	25.8	500	33.1			265	129mA	29kHz
	15	26.6	400	32				144mA	1.2MHz
	15	24.7	300	31.2			263	141mA	1.2MHz
	15		200							off
1529	30	0	0	24.1	3000	0.000855	259			anode only
1530	30									reignition
1533	10	20.5	1200	39	2000	0.000277	253			plume
	10	20.5		46	1900					transition
	10	20.6		47.5	1800
	10	20.7		47.2	1700					spot
	10	21		37.7	1600
	10	20.8		37.2	1600
	10	21		37.1	1500
	10	21.1		36.4	1400
	10	21.4		36.1	1300
	10	21.6		35.8	1200
	10	21.7		35.4	1100
	10	21.7		35	1000
	10	21.8		34.8	900
	10	22.4		35	800
	10	23.1		35.3	700
	10	23.9		35.5	600
	10	24.7		36	500
1540	5	29.4	1200	51	800	0.00014	272			plume
	5	30.5		51.2	700
	5	31.1		52.3	600
	5	31.8		52.8	500
1542	15	21.7	800	34.5	1500	0.000423	273	158mA	440Hz
1547	15	20.9	100	52.2	2000	0.00042	272			plume
1548	15	20	100	35.8	1500	0.000421	273	148mA	3.4MHz
1619	15	22	100	42.2	1500	0.000417	258
1640	15	20	100	42	1500	0.000417	256
1711	15	19	100	42.4	1500	0.000415	248
1803	15	18.95	100	42.9	1500	4.12e-05	248.4
Orifice Diameter 1.4 mm
time	Krpyton	Keeper		Anode		pressure	Mount	Anode fluctuation
	in sccm	in V	in mA	in V	in mA	in mbar	temp. In °C	Current	Frequency	Comment
1316	0	0	0	0	0	7.3e-07
1319	30	500	1200	500	3000					ignition from high pressure
1320	30	19.1	1200	23.6	3000	0.00084				spot mode
1321	30	18.39	1200	24.2	3000	0.000846	85	200mA	3.4MHz
	30	18.13	1100	27.4	3000		157	195mA	3.2MHz
	30	17.5	1000	28.3	3000		179	192mA	3.2MHz
	30	16.5	900	29.3	3000		204	187mA	3.2MHz
	30	17.4	800	29.5	3000		219	180mA	3.4MHz
	30	17.1	700	29.6	3000		236	176mA	3.4MHz
	30	16.2	600	30.5	3000		248	175mA	3.3MHz
	30	16	500	30	3000		261	190mA	3.1MHz
	30	15.8	400	31.2	3000		274	181mA	3.1MHz
	30	15.4	300	32.9	3000		280	195mA	3.1MHz
	30	14.7	200	33.4	3000		285	188mA	3.1MHz
	30	13.7	100	38	3000		289
1334	30	17.8	1200	26.5	2500	0.00086	297	191mA	3.5MHz
	30	17.2	1100	28.9	2500		301	185mA	3.4MHz
	30	17.15	1000	30.5	2500		303	189mA	3.4MHz
	30	17.3	900	32.8	2500		305	183mA	3.3MHz
	30	17.4	800	32.5	2500		307.6	180mA	3.4MHz
	30	17.45	700	32.6	2500		308.4	178mA	3.3MHz
	30	17.4	600	31.5	2500		309.25	184mA	3.4MHz
	30	17.1	500	32.1	2500		309.1	179mA	3.4MHz
	30	16.9	400	30.9	2500		309.3	184mA	3.3MHz
	30	16.3	300	32.3	2500		308.8	177mA	3.5MHz
	30	15.9	200	31.2	2500		308.3	183mA	3.5MHz
	30	15	100	33.1	2500		307.6	179mA	3.6MHz
1346	30	19.2	1200	30.9	2000	0.000868	306	180mA	1.2MHz
	30	19	1100	30.3	2000		306.2	180mA	1.2MHz
	30	18.7	1000	36.1	2000		306.9	189 mA	1.2MHz	Spot
	30	18.3	1000	42.5	2000		307.7			plume
	30	19.3	900	27.3	2000		308	188mA	1.2MHz
	30	19.9	800	29	2000		308.5	184mA	1.2MHz
	30	19.6	700	30	2000		308.6	181mA	1.1MHz
	30	19.7	600	31	2000		308.5	180mA	1.17MHz
	30	19.78	500	31.5	2000		308.2	183mA	1.1MHz
	30	19.7	400	33.1	2000		305.3	182mA	1.1MHz
	30	18	300	33.7	2000		303.79	180mA	1.1MHz
	30	18.5	200	35.5	2000		302.8	181mA	1.2MHz
	30	18.1	100	35.1	2000		301.7	179mA	1.19MHz
1403	30	21.5	1200	30.1	1500	0.000868	300.3	183mA	3.4MHz
	30	20.3	1100	31.1	1500		301.9	182mA	3.4MHz
	30	21.7	1000	32	1500		303.5	175mA	3.4MHz
	30	21.8	900	34.2	1500		306.4	175mA	3.2MHz
	30	22	800	35.3	1500		306.5	170mA	3.4MHz
	30	22.6	700	37.8	1500		306.5	172mA	3.4MHz
	30	22.8	600	41.3	1500		306.3	158mA	3.2MHz
	30	22.9	500	45.6	1500		305.3	150mA	3.1MHz
	30	22.8	400	51.3	1500		304.8	1A	47kHz	Plume
1420	30	23.7	1200	28.9	1000	0.000866	303.9	171mA	3.6MHz
	30	22.9	1100	30.1	1000		303.5	171mA	3.6MHz
	30	24.8	1000	31.3	1000		303.6	172mA	3.7MHz
	30	23.3	900	27.6	1000		304	183mA	3.6MHz
	30	25.1	800	31.5	1000		303.5	173mA	3.7Mhz
	30	25.2	700	33.1	1000		302.5	166mA	3.6MHz
	30	25.9	600	36	1000		301.5	158mA	3.8MHz
	30	27.2	500	46	1000		300	145mA	3.4MHz
	30	27.8	400	50.1	1000		299	145mA	3.3MHz
	30	28	300	56	1000		299	plume:1.1A	26kHz
1429	30	27.4	1200	36.5	500	0.000862	297	140mA	2.9MHz
	30	28.5	1100	43.8	500		297.1	119mA	2.6MHz
	30	28.4	1000	41.7	500		297.7	119mA	2.7MHz
	30	30.6	900	53	500		298.5	107mA	2.6MHz
	30	31.8	800	56.7	500		298.9	105mA	2.4MHz
	30	32.1	700	56.4	500		299	880mA	20.2kHz
1435	30	16.5	1200	44.1	3000	0.000863	299	200mA	3.5MHz	Reference
1437	25	16.3	1200	39	3000	0.00072	300.2	200mA	3.2kHz
	25	15.9	1100	37.7	3000		303.2	193mA	3.2MHz
	25	15.6	1000	29.3	3000		306.7	200mA	3.3MHz
	25	15.3	900	40.1	3000		310.7	1.4A	60kHz	Plume
	25	14.8	800	39.4	3000		314	1.6A	57kHz	Plume
	25	14.4	700	38.8	3000		315	1.6A	63kHz	Plume
	25	14.3	600	27	3000		316	192mA	3.1MHz
	25	14.4	500	26.1	3000		317	195mA	3.2Mhz
	25	14.2	400	26	3000		317	193mA	3.1MHz
	25	13.4	300	26	3000		317.4	199mA	3.1MHz
	25	13.3	200	26.8	3000		316.7	193mA	3.1Mhz
	25	12.6	100	28.2	3000		316.1	193mA	3.1MHz
1448	25	17.2	1200	41.1	2500		310	1.9A	49kHz
	25	17.3	800	44.5	2500		309	1.8A	49kHz
	25	17.5	700	31.7	2500		308	183mA	3.3Mhz
	25	17.2	600	29.4	2500		308.6	190mA	3.3MHz
	25	16.5	500	28.5	2500		309	190mA	3.3MHz
	25	15.6	400	27.6	2500		310	187mA	3.2MHz
	25	15.7	300	27.2	2500		311	188mA	3.3MHz
	25	15	200	26.9	2500		313	185mA	3.4MHz
	25	14	100	26.3	2500			183mA	3.4MHz
1504	25	18.5	1200	44.3	2000	0.000728	311	1.7A	38kHz
	25	3.2	1100	47	2000		313	643mA	63kHz
	25	2	1000	50	2000		313	656mA	65kHz
	25	0.68	100	43	2000		308	620mA	73kHz
1516	25	0	0	48	1500	0.000726	307	350mA	14kHz
1517	25	0	0	59	1000	0.000726	307	419mA	51kHz
1518	20	0	0	44	3000	0.000586	306	1A	66kHz
1519	20	0	0	46.6	2500	0.000586	305	1A	49kHz
1521	20	0	0	49	2000	0.000586	306	650mA	84kHz
1522	20	0	0	42.5	1500	0.000585	307	360mA	6.3kHz
1523	20	0	0	47.7	1000	0.000585	307	114mA	1.7MHz
1524	20	0	0	63	500	0.000585	307	83mA	1.6MHz
1525	15	0	0	47.5	3000	0.000438	305	890mA	78kHz
1526	15	0	0	50	2500	0.000439	304	1.07A	38kHz
1527	15	0	0	47.5	2000	0.000439	304	490mA	64kHz
1528	15	0	0	54.6	1500	0.000439	306	540mA	73kHz
1529	15	0	0	61.9	1000	0.000439	307.5	330mA	96kHz
1530	15	0	0							end of test

## Sheet: Figure 16
Iodine and krypton test with a C12A7 electride type A emitter - Figure 16
Hand recorded data. For the automatically recorded data contact the author please.
time	Krpyton	Keeper		Anode		pressure	Base temp.	Anode fluctuation
	in sccm	in V	in mA	in V	in mA	in mbar	in °C	Current	Frequency	iodine valve current	Comment
1028	0	0	0	0	0	3.8e-06					valve block: 130°C
											iodine tank is heated to 85°C
1030	30	500	1200	500	3000	3.7e-06					goes on, goes off after a few seconds
1032	30	500	1200	500	500	0.00075					ignites and stays on longer, goes off
1033	30	500	1200	500	3000						Igniting, then going down to 1000mA immidiately
1034	20	32	1000	43	1000	0.00051	109				Plume mode
1035	10	37	1200	50	500	0.00029	114				Plume mode/transition, works over wide range
1041	20	30.2	1000	56	1000	0.00051	132				Transition from 3A on anode to 500mA
1043	10	30.9	1200	55	1000	0.00026	136				Plume
1046	10	28.3	1200	52.8	1000	0.00026
1051	10	29	1200	55	1000	0.00026	133				Plume
1052	15	26.3	100	62.2	1500	0.00038	132	177 mA	12.2 kHz		Transition
1054	20	27.4	100	47.6	1500	0.00051	130	40 mA	32 kHz		Spot
1056											goes off
1058	20	500	1200	500	3000	6.9e-05	127				Instant ignition, goes off for lower keeper currents
1100	30	500	1200	500	3000						turns off after ignition
1101	30	29	1200								goes directly off again
1103	30	19.7	1200								plasma goes out sideways, goes off fast
1105											Always stays on for a few seconds then suddenly goes off
1106	30	17.6	1200	33.2	3000	0.00077	125				Spot
1108	30	14.9	100	36.3	3000	0.000778	128				goes off
1110	30	22.2	1200	44.9	1500	0.00076	133	36 mA	3.8 MHz		Fast reignition
1113	30	26	1200	51	1500	0.00026	135				Strong glow at the side of the keeper
1115											End of test
1315	30	500	1200	500	3000	1.9e-06	106				reignition, labview crashed
1325	30	500	1200	500	3000	1.9e-06	94				reignition
1327	30	16.8	1200	38.2	3000	0.00074	89				Spot
1328	30	19.7	1000	42	1500	0.000749	91				Spot
1331	30	16.7	1000	42.7	1500	0.000759	101	38 mA	3.8 MHz		very stable spot mode
1342	30	19.3	1000	43.5	1500	0.000771	131	36 mA	3.8 MHz		spot
1343	30	17.5	1000	43.5	1500	0.000774	135.2				plasma power fluctuations, check logs
1350	30	17.5	1000	41.4	1500	0.000779	133.2			0.1222	Slowly activating iodine flow
1551	0	25.8	1000	42.6	1500	0.0004	132			0.1291	Iodine only
1352	0	16.6	1000	56	1500	0.001	132			0.1343	High pitched noises PS
1354	0	18.1	1000	43.1	1200
1355	0	19.1	1000	43.5	900
1357	0	24.6	1200	56	1500	0.00042	130.8			0.1252
1401	0	11.7	1200	50	3000	0.0011	132
1405	30	26.9	1200	67	3000	0.0008	132.8			0	Krypton ignition, krypton plasma is purple, M10
1408	30	18.2	100	56	3000	0.00068	132.9			0	Plasma ball on anode
1410	30	15.4	100	48.4	3000	0.000689	132.5	71 mA	37 kHz	0
1412	30	21	100	52	3000	0.00045	131.2			0.1212	switched to iodie, worked
1415											keeper short circuit
1416	30	15	100	45	1500	0.00079					reignition with krypton
1425											labview crash
1502	30	15	1200	45	3000	0.00079					reignition with krypton
1504	30		1200		3000						No krypton discharge possible anymore, cathode goes on at 200W
1506											end of test

## Sheet: Figure 17
Iodine and krypton test with a C12A7 electride type A emitter - Figure 17
Hand recorded data. For the automatically recorded data contact the author please.
time	Krpyton	Keeper		Anode		pressure	Base temp.	Anode fluctuation
	in sccm	in V	in mA	in V	in mA	in mbar	in °C	Current	Frequency	iodine valve current	Tank temp. In °C	Comment
935	0	0	0	0	0	1.23e-06	26.7			0		started heaters except tank
1110	0	0	0	0	0	2.6e-06	89			0		started tank heating, set to 85°C
1353	0	0	0	0	0	3.1e-06	91			0		prop: 130°C, tank: 85°C, mount: 91°C
1355	30	500	700	500	500	3.1e-06	91			0		Instant ignition, goes off
1411	30	500	800	500	1200	0.000745	125			0		takes long, suddenly ignites, forced on keeper
1412	30	28	1200	33.4	1200	0.000746	127			0
1418	30	31.3	500	45.6	1200	0.00075	179			0
1420	20	34.2	500	51	1200	0.0005	177.5			0
1423	20	34.3	500	53.2	1200	0.0005	154			0		heating iodine tank to 110°C
1428	20	37.3	500	48	1200	0.0005	154	153 mA	3.4 MHz	0
1430	20	32.1	800	40.5	1500	0.000505	154.4	174 mA	1.2 MHz	0
1438	20	42	500	51.1	1200	0.000504	160	170 mA	1.3 MHz	0
1445	20	41.9	500	52.1	1200	0.000505	161.6			0.1		starting iodine transfer
1446										0.13		pressure spike, goes off
1450										0.124	107	short iodine discharge
1456	0	530	7	0	0	0.00033	119			0.121	103	only iodine
1502	0	600	11	0	0	0.000294	115			0.1227	100.8
		16	1200	37	3000
1531		17	1200	35.2	3000	0.00054	96			0.1333
1537	0	17	1200	38	3000	0.000524	131			0.1319	94
1545	0	17	1200	35	3000	0.001	125				93	iodine discharge seems to be mostly independent of valve setting
1549	0	20	1200	40.1	3000	0.00045	128			0.1311	92.6
		12	1200	28	2000	0.0011	132			0.1379	92.1
		12	1200	29.7	2000	0.0011	134			0.1379	91.6
1555		23	800	34.9	2000	0.00094	133			0.1381	91.3
1607		12	1150									only goes on after krypton pressure spike, but only afterwrds!

## Sheet: Figure 19
Krypton test with a C12A7 electride type A emitter - Figure 19
Hand recorded data. For the automatically recorded data contact the author please.
time	Krpyton	Keeper		Anode		pressure	Base temp.
	in sccm	in V	in mA	in V	in mA	in mbar	in °C	Comment
958	0	0	0	0	0	9e-07	130	valve block: 130°C
1000	30	500	1200	500	3000			Instant ignition
1001	30	15.1	500	38	1000	0.00078	130.1	Plume, slightly unstable.
1003	30	12.3	1000	33	1500	0.0008	135	Goes off, instant reignition, plume changes colour (yellow?)
1005	30	13.1	500	34	1000	0.0008	140
1011								End of test

## Sheet: Figure 21
Krypton test with a C12A7 electride type A emitter - Figure 21
Hand recorded data. For the automatically recorded data contact the author please.
time	Krpyton	Keeper		Anode		pressure	Base temp.	Prop. Valve
	in sccm	in V	in mA	in V	in mA	in mbar	in °C	in A	Comment
1032	0	0	0	0	0	2.74e-06	125	0	valve block: 130°C, Iodine tank is heated to 85°C.
1033	0	500	1200	500	3000	2.74e-06	126	0.122	Trying direct ignition with iodine
1034	0	500	4	500	0.3	0.000159	132	0.145	Only current, also chamber pressure does not rise further
1039	0	500	0	500	0	4.7e-05	137	0	Iodine pressure was too low, heating to 95°C
1045	0	500	1200	500	3000	1.5e-05	133	0.122	Trying iodine only ignition
1047	0	14	1200	41	2000	8.1e-05	126	0.167	Ignition only with krypton pulse
1049	0	9	100	41	3000	9e-05	133	0.16	goes off, reignition with krypton
1051	0	15	500	40	2500	0.0002	143	0.17
1054	0	16	1200	55	3000	0.00021	152	0.13	Purple plasma
1056	0	16.2	1200	50	3000	0.000259	157	0.13	Stable discharge: plume
1100	0	16.6	1200	51	3000	0.00033	170	0.14
1101	0	15.5	100	51	3000	0.00044	172	0.14
1107	0	20.2	500	51	3000	0.0014	175	0.14
1114						0.0016			Ignition no longer possible, maybe orifice blocked?
